# Supplementary material for: Convergent evolution of gene expression in two high-toothed stickleback populations
Source: PLoS Genet. 2018 Jun 13;14(6):e1007443. doi: 10.1371/journal.pgen.1007443 (PMC6016950; doi:10.1371/journal.pgen.1007443)
Supplement: S1 Table — For each fish, the population, ecotype (freshwater or marine), total ventral pharyngeal tooth number (TVTP), total length (TL), standard length (SL), and whether data has been published [30] is shown. (XLSX) [file pgen.1007443.s008.xlsx]

## Sheet: Sheet1
Pop	Pop Ecotype	TVTP	TL	SL	in Ellis 2015?
PAXB	Fresh	79	41.88	37.47	Y
PAXB	Fresh	75	48.13	43.66	Y
PAXB	Fresh	74	46.04	41.72	Y
PAXB	Fresh	78	45.22	40.59	Y
PAXB	Fresh	111	56.03	49.56	Y
PAXB	Fresh	85	43.7	40.15	Y
PAXB	Fresh	86	42.9	37.5	Y
PAXB	Fresh	71	40.58	37.11	Y
PAXB	Fresh	86	46.75	40.96	Y
PAXB	Fresh	96	48.25	44.85	Y
PAXB	Fresh	87	40	37.59	Y
PAXB	Fresh	59	39.86	35.98	Y
PAXB	Fresh	87	39.39	36.61	Y
PAXB	Fresh	88	42.18	37.36	Y
PAXB	Fresh	61	42.26	38.21	Y
PAXB	Fresh	83	39.42	36.94	Y
PAXB	Fresh	88	46.33	42	Y
PAXB	Fresh	88	43.19	38.49	Y
PAXB	Fresh	78	43.72	39.48	Y
PAXB	Fresh	63	38.27	35.07	Y
PAXB	Fresh	72	44	39.1	Y
PAXB	Fresh	82	48.22	43.72	Y
PAXB	Fresh	88	44.98	41.31	Y
PAXB	Fresh	89	47.18	44.61	Y
PAXB	Fresh	99	44.11	40.71	Y
PAXB	Fresh	89	47.26	43.62	Y
PAXB	Fresh	62	43.67	40.27	Y
PAXB	Fresh	72	44.25	40.37	Y
PAXB	Fresh	53	40.39	36.73	Y
PAXB	Fresh	75	52.99	48.11	N
PAXB	Fresh	95	51.67	47.23	N
PAXB	Fresh	70	52.73	47.72	N
RABS	Marine	46	52.48	47.24	N
RABS	Marine	47	53.34	48.57	N
RABS	Marine	44	50.67	45.05	N
RABS	Marine	49	50.57	45.27	N
RABS	Marine	59	53.01	47.14	N
RABS	Marine	35	54.32	48.77	N
RABS	Marine	39	54.46	48.81	N
RABS	Marine	36	55.38	49.39	N
RABS	Marine	38	51.5	45.74	N
RABS	Marine	35	53.19	47.3	N
RABS	Marine	42	51.03	45.84	N
RABS	Marine	55	50.55	45.62	N
RABS	Marine	65	44.53	39.51	N
RABS	Marine	68	38.67	35.14	N
RABS	Marine	58	49.62	37.67	N
RABS	Marine	63	42.92	37.75	N
RABS	Marine	61	42.64	37.74	N
RABS	Marine	60	41.25	36.51	N
RABS	Marine	54	43.06	37.9	Y
RABS	Marine	51	39.35	35.22	Y
RABS	Marine	52	45.35	40.4	Y
RABS	Marine	48	41.06	37.12	Y
RABS	Marine	61	44.1	39.42	Y
RABS	Marine	48	41.21	36.32	Y
RABS	Marine	64	43.75	38.7	Y
RABS	Marine	41	40.23	35.82	Y
RABS	Marine	59	46.81	40.8	Y
RABS	Marine	43	43.25	38.72	Y
RABS	Marine	57	43.39	39.2	Y
RABS	Marine	45	43.21	38.35	Y
RABS	Marine	45	41.32	36.81	Y
RABS	Marine	58	48	41.63	N
RABS	Marine	52	45.57	39.72	N
RABS	Marine	45	41.93	36.17	N
RABS	Marine	44	48.83	43.65	N
RABS	Marine	50	43.21	37.64	N
RABS	Marine	56	49.56	44.18	N
RABS	Marine	52	43.47	38.39	N
RABS	Marine	49	43.16	37.45	N
RABS	Marine	57	42.62	37.25	N
RABS	Marine	49	50.08	43.62	N
RABS	Marine	54	45.36	39.39	N
RABS	Marine	51	43.43	37.51	N
RABS	Marine	42	42.24	37	N
CERC	Fresh	74	46.61	41.65	Y
CERC	Fresh	94	39.67	35.44	Y
CERC	Fresh	73	40.42	35.8	Y
CERC	Fresh	84	40.89	37.12	Y
CERC	Fresh	82	39.82	35.67	Y
CERC	Fresh	72	43.64	38.62	Y
CERC	Fresh	92	42.47	38.28	Y
CERC	Fresh	95	40	36.28	Y
CERC	Fresh	83	39.54	35.29	Y
CERC	Fresh	83	38.98	35.48	Y
CERC	Fresh	68	40.3	36.76	Y
CERC	Fresh	75	40.63	36.38	Y
LITC	Marine	50	54.9	49.44	N
LITC	Marine	49	48.55	43.25	N
LITC	Marine	56	54.47	48.84	N
LITC	Marine	53	54.87	49.27	N
LITC	Marine	42	53.45	48.18	N
LITC	Marine	54	43.7	40.28	N
LITC	Marine	55	42.82	38.32	N
LITC	Marine	52	44.15	40.14	N
LITC	Marine	52	39.25	36.93	N
LITC	Marine	56	44.16	40.16	N
LITC	Marine	55	43.06	38.57	N
LITC	Marine	58	43.84	40.22	N
LITC	Marine	78	53.85	48.83	N
LITC	Marine	64	48.26	43.05	N
LITC	Marine	38	47.72	43.17	N
LITC	Marine	54	45.22	41.58	N
LITC	Marine	59	46.5	41.7	N
LITC	Marine	72	53.2	48.34	N
LITC	Marine	53	45.24	40.84	N
LITC	Marine	59	50.4	46.03	N
LITC	Marine	54	44.66	41.32	N
LITC	Marine	52	39.83	36.87	N
LITC	Marine	64	41.99	39.28	N
LITC	Marine	60	38.96	35.36	N
LITC	Marine	63	57.89	48.09	N
LITC	Marine	76	44.52	41.46	N
LITC	Marine	78	52.35	47.99	N
LITC	Marine	48	50.53	45.58	N
LITC	Marine	65	47.02	42.95	N
LITC	Marine	81	51.52	47.64	N
LITC	Marine	62	56.12	49.86	N
LITC	Marine	63	52.86	48.59	N
LITC	Marine	48	53.07	48.65	N
LITC	Marine	48	54.35	48.41	N
LITC	Marine	75	48.37	43.61	N
LITC	Marine	61	51.17	45.35	N
LITC	Marine	49	50.2	45.28	N
LITC	Marine	57	50.07	45.64	N
LITC	Marine	55	47.78	42.61	N
LITC	Marine	46	42.44	38.14	N
LITC	Marine	52	39.7	35.96	N
LITC	Marine	76	52.56	47.71	N
LITC	Marine	51	46.59	41.45	N
LITC	Marine	59	47.84	43.57	N
LITC	Marine	63	49.6	45.18	N
LITC	Marine	56	45.61	41.16	N
LITC	Marine	63	39.89	35.77	N
LITC	Marine	106	55.05	49.35	N
LITC	Marine	60	55.06	49.86	N
LITC	Marine	56	54.64	49.57	N
LITC	Marine	64	55.43	49.39	N
LITC	Marine	62	54.64	49.16	N
