# Supplementary material for: Convergent evolution of gene expression in two high-toothed stickleback populations
Source: PLoS Genet. 2018 Jun 13;14(6):e1007443. doi: 10.1371/journal.pgen.1007443 (PMC6016950; doi:10.1371/journal.pgen.1007443)
Supplement: S2 Table — For each fish, population and biological replicate number (Fish), the total number of barcoded reads from each fish (reads), and number of reads that mapped and passed all filters (final mapped) is listed. (XLSX) [file pgen.1007443.s009.xlsx]

## Sheet: Sheet1
Fish	Reads	Final Mapped
PAXB1	54682734	41536045
PAXB2	32925802	27561555
PAXB3	39144478	33907774
CERC1	43204268	36319583
CERC2	51249116	37310922
CERC3	61773485	34238217
LITC1	70365294	58516503
LITC2	69017068	58385657
RABS	39016218	33380182
